# Supplementary material for: Deviation of the typical AAA substrate-threading pore prevents fatal protein degradation in yeast Cdc48
Source: PubMed Central journal article supplement (PMC5511170; doi:10.1038/s41598-017-05806-y), 2017-07-14
Supplement: 41598_2017_5806_MOESM1_ESM.pdf [file 41598_2017_5806_MOESM1_ESM.pdf]

Supplementary information

**Deviation of the typical AAA substrate-threading pore prevents fatal protein degradation in yeast Cdc48**

Masatoshi Esaki, Md. Tanvir Islam, Naoki Tani, and Teru Ogura

|         |     | Walker A                                                                      | pore                                            | Walker B                           | SRH                                              |                                                           |                                   |          |
|---------|-----|-------------------------------------------------------------------------------|-------------------------------------------------|------------------------------------|--------------------------------------------------|-----------------------------------------------------------|-----------------------------------|----------|
| Cdc48_N | 250 | GVLMYGPPGTGKTLMARAVAN-----                                                    | ETGAFFFLINGP----                                | EVMSKMAGESESNLKAFEEAEKNAPA-----    | IIFIDEIDSIAPKRD----                              | KTN-GEVERRVVSQLLTLMGGMK-----                              | ARSN-VVVI AATNRPNSIDPALRRFGRFDR   | 375      |
| Cdc48_C | 523 | GVLFGPPGTGKTLAKAVAT-----                                                      | EVSANFISVKGP----                                | ELLSMWYGESESNIRDIFDKARAAAPT-----   | VVFLDELDSIAKARGGS--                              | LG DAGASDRVVNQLLTEMGMN-----                               | AKKN-VFVIGATNRPDQIDPAILRPGRLDQ    | 651      |
| Afg2_N  | 281 | GILLHGPPGTGKTM LRRVAN-----                                                    | TSNAHVLTINGP----                                | SIVSKYLGETEALRDI FNEARKYQPS-----   | IIFIDEIDSIAPNRA----                              | NDDSGEVESRVVATLLTLMGGMG-----                              | AAGK-VVVI AATNRPNSVDPALRRPGRFDQ   | 407      |
| Afg2_C  | 552 | GVLLYGPPGCKTLTAKALAT-----                                                     | ESGINFLAVKGP----                                | EIFNKYVGESERAIREIFRKARSAAPS-----   | IIFDEIDALSPDRD-----                              | GSSTSAANHVL TSL LNEIDGVE-----                             | ELKG-VVVI AATNRPDEIDAALLRPGR LDR  | 677      |
| Afg3    | 323 | GAILSGPPGTGKTL LAKATAG-----                                                   | EANVPFLSVSGS----                                | EFVEMFVGVGASRV RDLFTQARSMAPS-----  | IIFIDEIDAIGKERGKGGALGGANDEREATLNQLLVEMDGFT-----  | TSDQVVVLAGTNRPDVL DNALMRPGRFDR                            | 453                               |          |
| Bcs1    | 262 | GVLLYGPPGSGKTSFIQALAG-----                                                    | ELDYNICILNLS-----                               | ENNLTDRLNHL MNNMPERS----           | ILLEDIDA AFNKRSQT---                             | GEQGFHSSVTF SGLNLDGVT-----                                | SSEETITFMTT NHPEKLDAAIMRPGRIDY    | 382      |
| Msp1    | 128 | GVLLYGPPGCGKTM LAKALAK-----                                                   | ESGANFISIRMS----                                | SIMDKWYGESNKIVDAMFSLANKLQPC-----   | IIFIDEIDSLRERS--                                 | STDHEVTATLKA EFM TLWDGLN-----                             | NGRVM IIGATNRINDIDDAFLR--         | RLPK 251 |
| Pch2    | 309 | LLL VH GPPGTGKTT LCKALCQ(12)                                                  | TIDTNYKGIIE LSCARIFSKWFGESSKNISIVFKDIEELLKV (8) | CLLIDEVEAI ASSR TNLS--             | SRNESTDGI RVVNTLLTQLDR LK-----                   | KYHNFLALATSNL LDSLDDAFVD--                                | RADG 461                          |          |
| Pex1    | 733 | GILLYGPPGCKTLLASAVAQ-----                                                     | QCGLNFISVKGP----                                | EILNKFIGASEQNIREL FERAQSVKPC-----  | ILFFDEFDSIAPKRG----                              | HDSTGVTDRVVNQLL TQMDGAE-----                              | GLDG-VYILAATS RPD LIDSALLRPGR LDK | 858      |
| Pex6    | 761 | GILFYGPPGTGKTLMAKAIAT-----                                                    | NFSLNFFSVKGP----                                | ELLNMYIGE SEANVRRVFQKAREAKPC-----  | VIFFDEIDSVAPKRG--                                | QGDSSGVM DRIVS QLLAE LDGMS-----                           | TDADGVFVIGATNRPD LLEALLRPGR FDK   | 895      |
| Rix7_N  | 241 | GVL LH GPPGCKT SIANALAG-----                                                  | ELQVPFISISAP----                                | SVVSGMSESEKIRDL FDEARSLAPC-----    | LVFFDEIDAITPKRDGG----                            | AQREMERRIVA QLLTSMDEL TME----                             | KTNGKPVIIIGATNRPDSLDAALRRAGRFDR   | 371      |
| Rix7_C  | 569 | GVL LW GPPGCKTLLAKAVAN-----                                                   | ESRANFISIKGP----                                | ELLNKYVGESESRIRQVFTRARASVPC-----   | VIFFDELDA L VPRRDT S--                           | LSES---SSRVVNTLL TELDGLN-----                             | DRRG-IFVIGATNRPDMIDPAMLRPGR LDK   | 694      |
| Rpt1    | 245 | GILLYGPPGTGKTL CARAVAN-----                                                   | RTDATFIRVIGS----                                | ELVQKYVGE GARMVREL FEMARTKKAC----- | IIFDEIDAVGGARFDD--                               | GAGGDNEVQRTMLELITQLDGF D-----                             | PRGN-IKVMFATNRPNTLDPALLRPGR IDR   | 373      |
| Rpt6    | 184 | GVILY GPPGTGKTL LARAVAH-----                                                  | HTDCKFIRVSGA----                                | ELVQKYIGE GSRMVREL FVMAREHAPS----- | IIFMDEIDSI GSTRVEG--                             | SGGDSEVQRTMLEL LNQLDGF E-----                             | TSKN-IKIIMATNRLDILDPALLRPGR IDR   | 312      |
| Rpt5    | 217 | GALMYGPPGTGKTL LARACAA-----                                                   | QTNATFLKLAAP----                                | QLVQMYIGE GAKLVRDAFALAKEKAPT-----  | IIFIDELDAIGTKRFDS--                              | EKSGDREVQRTMLEL LNQLDGF S-----                            | SDDR-VKVL AATNRPVLDLDPALLRSGR LDR | 345      |
| Rpt2    | 219 | GVILY GAPGTGKTL LAKAVAN-----                                                  | QTSATFLRIVGS----                                | ELIQKYLGDGPRLCRQIFKVAGENAPS-----   | IVFIDEIDAIGTKRYDS--                              | NSGGEREIQRTMLEL LNQLDGF D-----                            | DRGD-VKVIMATNKIETLDPALIRPGR IDR   | 346      |
| Rpt3    | 208 | GVL LY GPPGTGKTM LKAVAN-----                                                  | STKA AFIRVNGS----                               | EFVHKYLGE GPRMVRDVFRLARENAPS-----  | IIFIDEVDSIATKRFDA--                              | QTGSDREVQRILIELL TQMDGF D-----                            | QSTN-VKVIMATNRADTLDPALLRPGR LDR   | 336      |
| Rpt4    | 217 | GVL LY GPPGTGKTL LAKAVAA-----                                                 | TIGANFIFSPAS----                                | GIVDKYIGE SARIREMFAYAKEHEPC-----   | IIFMDEVDAIGGRRFSE--                              | GT SADREIQR TLMELL TQMDGF D-----                          | NL GQ-TKIIMATNRPDTLDPALLRPGR LDR  | 345      |
| Sap1    | 640 | GMLLFGPPGTGKTM LARAVAT-----                                                   | ESHSTFFSISAS----                                | SLTSKYLGESEKLVRALFAIAKKLSPS-----   | IIFVDEIDSI MGSRNENENESSRRRIKNEFLVQWSSLSAAAG (14) | EDDTRVLVLAATNLPWSIDEAARR--                                | RFVR 784                          |          |
| Sec18   | 553 | SLLI H G P A G S G K T L A A E I A L-----                                     | KSGFPFIRLISP N-----                             | ELSGMSESAKIAYIDNTFRDAYKSPLN-----   | ILVIDSLETLV DWVPIG--                             | PRFS---NNILQMLKVALKRKP-----                               | PQDRRLIMTTTT SAYSVLQQMDILSCFDNE   | 685      |
| Yme1    | 316 | GVL LT G P P G T G K T L L A R A T A G-----                                   | EAGVDF FMSGS----                                | EFDEVYVGVGAKRIRDLFAQARSRAPA-----   | IIFIDELDAIGGKRNPK----                            | DQ-AYAKQTLNQLLVELDGF S-----                               | QTSG---IIIIGATNFPEALDKALTRPGR FDK | 441      |
| Yta6    | 506 | GMLLFGPPGTGKTM IAKAVAT-----                                                   | ESNSTFFSVSAS----                                | SLLSKYLGESEKLVRALFYMAKKLSPS-----   | IIFIDEIDSM L TARS--                              | DNENESSRIKTELLIQWSSLSATAQSEDRNNTLDSRVLVLGATNLPWAIDDAARR-- | RFSR 641                          |          |
| Yta7    | 442 | GVL FH G P P G T G K T L M A R A L A A S C S S D E R K I T F F M R K G A----- | DILSKWVGEAERQLRLLFE EAKKHQPS-----               | IIFDEIDGLAPVRS----                 | SKQ-EQI HASIVSTLLALMDGMD-----                    | NRGQ-VIVIGATNRPDAVDPALRRPGR FDR                           | 579                               |          |
| Yta12   | 383 | GAILSGPPGTGKTL LAKATAG-----                                                   | EAGVPFYVSGS----                                 | EFVEMFVGVGAARV RDLFKTARENAPS-----  | IVFIDEIDAIGKARQKG--                              | NFSGANDERENTLNQMLVEMDGFT-----                             | PADHVVLVLAGTNRPDILDKALLRPGR FDR   | 512      |
| Vps4    | 168 | GILLYGPPGTGKSYLAKAVAT-----                                                    | EANSTFFSVSSS----                                | DLVSKW MGESEKLVKQLFAMARENKPS-----  | IIFIDEVDAL TGTRG--                               | EGESEASRIKTELLVQMGVGNDSQG-----                            | VLVLGATNIPWQLDSAIRR--             | RFER 292 |
|         |     | .. * . * . * :                                                                | .                                               | :                                  | .....                                            | .                                                         | .                                 | .. :     |

**Supplementary Figure S1.** A sequence alignment of AAA modules found in the budding yeast *Saccharomyces cerevisiae*.

N domain

|    |                                                                                                      |     |
|----|------------------------------------------------------------------------------------------------------|-----|
| Sc | MGECHKPLLDASGVDPREEDKTATAILRRKKKDNMLLVDDAINDDNSVIAINSNTMDKLELFRGDTVLVKGGKRRKDTVLIVLIDDELEDGACRINRVRN | 100 |
| Tb | -----MSAKAQQVKQKLNRLIADLLAEDDNSVVVLNAKRMDLSEIFRGDTVLLKGGKRRSTICIAMSDENCPEGSIMVNKVTTR                 | 80  |
| Ce | --MASVP--THQSEKKNDELSTAILKDKVKNLIVDQSEQDNDNSVIAVSAQMDELGLFRGDAVILKGGKRRKSVIAIIVSDENCPKVRMNRVVRN      | 96  |
| At | ---MSTP--A-ESSDSKSKDFSTAILERKKSPNRLVVDEAINDDNSVSLHPTAMEKLQFLFRGDTILIKGGKRRKDVICIALADETCEEPKIRMNKVRS  | 94  |
| Mm | -----MASGADSKGDDLSTAILKQKNRPNRLIVDEAINDDNSVSLSQPKMDELQFLFRGDTVLLKGGKRRREAVCIVLSDDTCSDEKIRMNRVVRN     | 90  |
| Hs | -----MASGADSKGDDLSTAILKQKNRPNRLIVDEAINDDNSVSLSQPKMDELQFLFRGDTVLLKGGKRRREAVCIVLSDDTCSDEKIRMNRVVRN     | 90  |

N domain

|    |                                                                                                      |     |
|----|------------------------------------------------------------------------------------------------------|-----|
| Sc | NLRIRLGDVLTIIHPCDIKYATRISVLPDIADTIEGITGNLFDVFLKPYFVEAYRPVRKGDHFVVRGGMRQVEFKVVVDPEEYAVVAQDTIIHWEGEPIN | 200 |
| Tb | NIRILLGDLITVSSHNPYGNHVHVLPIDDTVKNTLTDGLFETFLKPYFLEAYRPVKTGDLFICRGAMRSVEFKVVEVDPGCCIVAPETVVHCEGDP     | 180 |
| Ce | NLRIRLGDVVSITPAPNLSYGTRIHVLPIDDTIEGLTGNLFDVFLKPYFLEAYRPLHKGIDFTVQAMRTVEFKVVEETPAPACIVSPDTMIHYEGDP    | 196 |
| At | NLRVRLGDVIVSHQCPDVKYGKRHVHLVVDDTVEGVTGNLFDAYLKPYLEAYRVRKGDVFLVVRGMRSEVFKVIETDPAEYCVVADTEIFCEGDP      | 194 |
| Mm | NLRVRLGDVIVSIQCPDVKYGKRHVHLPIDDTIEGITGNLFEVYLKPYFLEAYRIRKGDVFLVVRGMRSEVFKVVEITDPSYCIVAPDTVICHCEG     | 190 |
| Hs | NLRVRLGDVIVSIQCPDVKYGKRHVHLPIDDTIEGITGNLFEVYLKPYFLEAYRIRKGDVFLVVRGMRSEVFKVVEITDPSYCIVAPDTVICHCEG     | 190 |

|    |                                                                                                     |               |      |     |
|----|-----------------------------------------------------------------------------------------------------|---------------|------|-----|
|    | N domain                                                                                            | D1 AAA domain | pore |     |
| Sc | REDEENNMEVGYDDIGGCRKQMAQIREMVELPLRHPQLFKAIGIKPPRGVLMYGGTGLMARAVANETGAFFFLINGPEVMSKMGAGESENLKRAF     |               |      | 300 |
| Tb | REDE-ERLDDVGYDDIGGCRRLVQIREMVELPIRHPQLFKAIGIKPPRGILMYGGTGLIARAVANETGAFFFLINGPEIMSKMGAGESEGNLRNAF    |               |      | 279 |
| Ce | REEEESMNDIGYDDLGGVRKQLAQIKEMVELPLRHPQLFKAIGIKPPRGILLFGPPGTGKTLIARAVANETGSFFFLINGPEVMSKMGAGESENLKRAF |               |      | 296 |
| At | REDE-ERLDDVGYDDVGGVRKQMAQIRELVELPLRHPQLFKAIGIKPPRGILLFGPPGTGKTLIARAVANETGAFFFCINGPEIMSKLAGESENLKRAF |               |      | 293 |
| Mm | REDEESLNEVGYDDIGGCRKQLAQIKEMVELPLRHPALFKAIGVPPRGILLYGGTGLIARAVANETGAFFFLINGPEIMSKMGAGESENLKRAF      |               |      | 290 |
| Hs | REDEEESLNEVGYDDIGGCRKQLAQIKEMVELPLRHPALFKAIGVPPRGILLYGGTGLIARAVANETGAFFFLINGPEIMSKLAGESENLKRAF      |               |      | 290 |

D1 AAA domain

|    |                                                                                                      |     |
|----|------------------------------------------------------------------------------------------------------|-----|
| Sc | EEAEKNAPAIIFIDEIDSIAPKRDKTNGEVERRVVSQLLTMDGKARSNVVIAATNRPNSIDPALRRFRGFRDREVDIGIPDATGRLEVLRIHTKNMKL   | 400 |
| Tb | VESEKNAPAIIFIDEIDSIAPKREKAQGEVEKRIVSOLLTMDGLKGRSQVIVMAATNRPNAIDPALRRFRGFRDREIDIGVPDEIGRLEILRIHTKNMKL | 379 |
| Ce | EECEKNQPAIFIDEIDAIAPKREKTNGEVERRISQLLTMDGKGRSNL VVIAATNRPNSIDGALRRFRGFRDREIDIGVPAVGRLEILRIHTKNMKL    | 396 |
| At | EEAEKNAPSIIFIDEIDSIAPKREKTNGEVERRISQLLTMDGKSAHVIVMGATNRPNSIDPALRRFRGFRDREIDIGVPAVGRLEILRIHTKNMKL     | 393 |
| Mm | EEAEKNAPAIIFIDELDAIAPKREKTHGEVERRISQLLTMDGKQRAHVIVMAATNRPNSIDPALRRFRGFRDREVDIGIPDATGRLEILQIHTKNMKL   | 390 |
| Hs | EEAEKNAPAIIFIDELDAIAPKREKTHGEVERRISQLLTMDGKQRAHVIVMAATNRPNSIDPALRRFRGFRDREVDIGIPDATGRLEILQIHTKNMKL   | 390 |

|    |                                                                                                       |               |     |
|----|-------------------------------------------------------------------------------------------------------|---------------|-----|
|    | D1 AAA domain                                                                                         | D2 AAA domain |     |
| Sc | ADDVDLEALAAETHGYVGADIASLCEAAMQQIREKMDLIDLDEDEIDAEDVLSLVGTMDFNFRFALGNSNPSALRETVEVSVNVTWDDVGGGLDEIKEEL  |               | 500 |
| Tb | DPNVDEKIAKDSHYGADLAQLCTEAAMQCVRKMAVVDWDEETDAEVLDSMSTVNNHFLDALSKMNPASALRETQVETPNVTVSDVGGLLDVKRELQ      |               | 479 |
| Ce | ADDVDLEQIANECHFGVADLAASLCEAALQQIREKMELIDLEDDQIDAEVLNLSAVTMENFRFAQKSSPSALREAVVETPNNTWSDIGGLQNVKRELQ    |               | 496 |
| At | AEDVDLERISKDTHGYVGADLAALCTEAALQCIREKMDVIDLEDDSIDAEILNSMAVTNEHFHTALGNSNPSALRETVEVSVNVTWDDVGGGLDENKRELQ |               | 493 |
| Mm | ADDVDLEQVANETHGHVADLAALCSEALQAIRKMDLIDLEDEETDAEVMNSLAVTMDDFRWALQSNSPSALRETVEVVPQVTWEDIGGLEDVKRELQ     |               | 490 |
| Hs | ADDVDLEQVANETHGHVADLAALCSEALQAIRKMDLIDLEDEETDAEVMNSLAVTMDDFRWALQSNSPSALRETVEVVPQVTWEDIGGLEDVKRELQ     |               | 490 |

|    |                                                                                                      |      |     |
|----|------------------------------------------------------------------------------------------------------|------|-----|
|    | D2 AAA domain                                                                                        | pore |     |
| Sc | ETVEYVPLHPDQYTKFGLSPSKGVLYFGPPGTGKTLAKAVATEVSANFISVKGPELLSMWYGESESNIRDIFDKARAAAPTUVVFLDELDSIAKARGGSL |      | 600 |
| Tb | ELVQYVPEFVWPKFEKYGISAPKGVLYFGPPGCGKTLAKAIAAETQANFISIKGPELLTMWFGESEANVRDVFDKARAAAPCVLFFDELDSIARSRHGS- |      | 578 |
| Ce | ELVQYVPEHPEKYKFGMPQSRGVLYFGPPGCGKTLAKAIAAETQANFISIKGPELLTMWFGESEANVRDVFDKARAAAPCVLFFDELDSIAKARGGGA   |      | 596 |
| At | ETVQYVPEHPEKFEKFGMPQSRGVLYFGPPGCGKTLAKAIAAETQANFISVKGPELLTMWFGESEANVREIFDKARQSAACVLFFDELDSIATQRGGG   |      | 593 |
| Mm | ELVQYVPEHPDKFLKFGMTPSKGVLYFGPPGCGKTLAKAIAAETQANFISIKGPELLTMWFGESEANVREIFDKARQAACVLFFDELDSIAKARGGNI   |      | 590 |
| Hs | ELVQYVPEHPDKFLKFGMTPSKGVLYFGPPGCGKTLAKAIAAETQANFISIKGPELLTMWFGESEANVREIFDKARQAACVLFFDELDSIAKARGGNI   |      | 590 |

D2 AAA domain

|    |                                                                                                      |     |
|----|------------------------------------------------------------------------------------------------------|-----|
| Sc | -GDAGGASDRVNQLLTEMGMNAKKNVFIIGATNRPDIIDPAVLRPGRDQIYIYIPLDENARLSILNAQLRKTPLPGLDELTAIAKATQGFSGADLLY    | 699 |
| Tb | --GDGGASDRVINQILTEMGMNSKKNVFIIGATNRPDVLDPVLRPGRDQIYIYIPLPKASRVAILLKASFRKSPVLPDVLQLAATHGFGSADLAG      | 676 |
| Ce | GGDGGASDRVINQVLTTEMGMNAKKNVFIIGATNRPDIIDPAVLRPGRDQIYIYIPLPDEASRHQIKASLRKTPLSKDLTLFLAKNTVGFSGADLTE    | 696 |
| At | GGDGGGAADRVLNQLLTEMGMNAKKTVFIIGATNRPDIIDPAVLRPGRDQIYIYIPLPDEASRLNIFKAALRKSPIAKDVIGLAKYQGFSGADITE     | 693 |
| Mm | -GDGGGAADRVINQILTEMGMSTKKNVFIIGATNRPDIIDPAVLRPGRDQIYIYIPLPDEKSRVAILLKANLRKSPVAKDQVLEFLAKMTNGFGSADLTE | 689 |
| Hs | -GDGGGAADRVINQILTEMGMSTKKNVFIIGATNRPDIIDPAVLRPGRDQIYIYIPLPDEKSRVAILLKANLRKSPVAKDQVLEFLAKMTNGFGSADLTE | 689 |

D2 AAA domain

|    |                                                                                                  |     |
|----|--------------------------------------------------------------------------------------------------|-----|
| Sc | IVQRAAKYAIAKDSIEAHRQHEAEKEVKEGEDVEMTDEGAKEAEPVDPVPYITKEHFAEAMKTAKRSVSDAELRRYEAYSQMKASRGQFSNFFNDA | 799 |
| Tb | ICQRACKLAIESIAKEIQLEEAR-----ANG-----VLNEDQDIDVPQITRLHVEEAMRGARRSVSDADIRKYELFATSLLQSRAGVNSLDPGN   | 763 |
| Ce | ICQRACKLAIESIEKEIRIEKER-----QDRQARGEELMEDDAVDPVEITRAHFEAMKFAARRSVTDNDIRKYEMFAQTLQQRGFGNFKFPGE    | 788 |
| At | ICQRACKLAIESIEKEIEKER-----SEN-----EAMEEDGVDEVEIKAHAEFESMRYARRSVSDADIRKYQFAQTLQQRGFGGSEFRFENS     | 781 |
| Mm | ICQRACKLAIESIESEIRRETER-----QTNP-----SAMEVEEDDPVPEIRRDHFEAMRFAARRSVSDNDIRKYEMFAQTLQQRGFGS-FRFPSG | 776 |
| Hs | ICQRACKLAIESIESEIRRETER-----QTNP-----SAMEVEEDDPVPEIRRDHFEAMRFAARRSVSDNDIRKYEMFAQTLQQRGFGS-FRFPSG | 776 |

HbYX

|    |                                        |     |     |                          |
|----|----------------------------------------|-----|-----|--------------------------|
| Sc | PLGTTATDNANSNSAPSAGAGAAGF---SNAEEDDLYS | 835 | Sc: | Saccharomyces cerevisiae |
| Tb | QG-GAGGDA-----G-----AGDDDLYS           | 780 | Tb: | Trypanosoma brucei       |
| Ce | QRGSDAPSA-----PVPV-----QDDDDLYN        | 809 | Ce: | Caenorhabditis elegans   |
| At | AGSGAT--T-----GVADPFATSAAGDDDLYN       | 809 | At: | Arabidopsis thaliana     |
| Mm | NQGGAGPSQ-----GSGGGTGGSVYTEDNDDLYG     | 806 | Mm: | Mus musculus             |
| Hs | NQGGAGPSQ-----GSGGGTGGSVYTEDNDDLYG     | 806 | Hs: | Homo sapiens             |

Supplementary Figure S2. A sequence alignment of eukaryotic Cdc48 homologs.

**a**

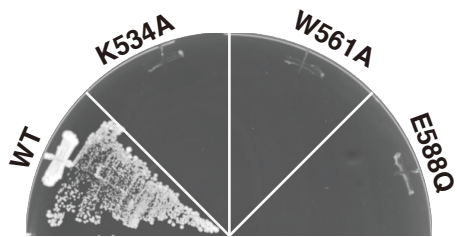

**b**

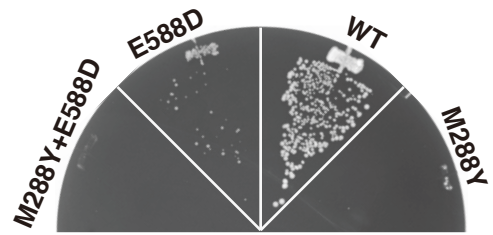

**Supplementary Figure S3.** Tested were viabilities of cells expressing Cdc48 with the indicated mutations as shown in Fig. 1b.

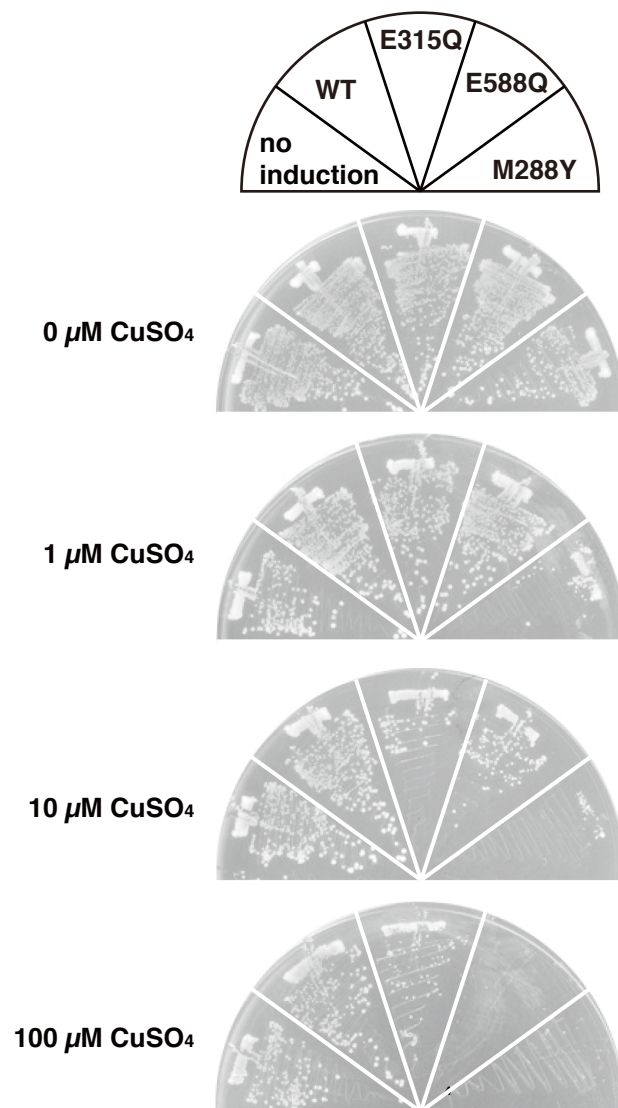

**Supplementary Figure S4.** Wild type cells were transformed with a *CUPI* promoter-regulated plasmid expressing wild type Cdc48 (WT), mutant Cdc48 with the replacement of E315Q, E588Q, and M288Y, and no proteins. The transformants were grown on media supplemented with  $\text{CuSO}_4$  at  $30^\circ\text{C}$  for 2 days.

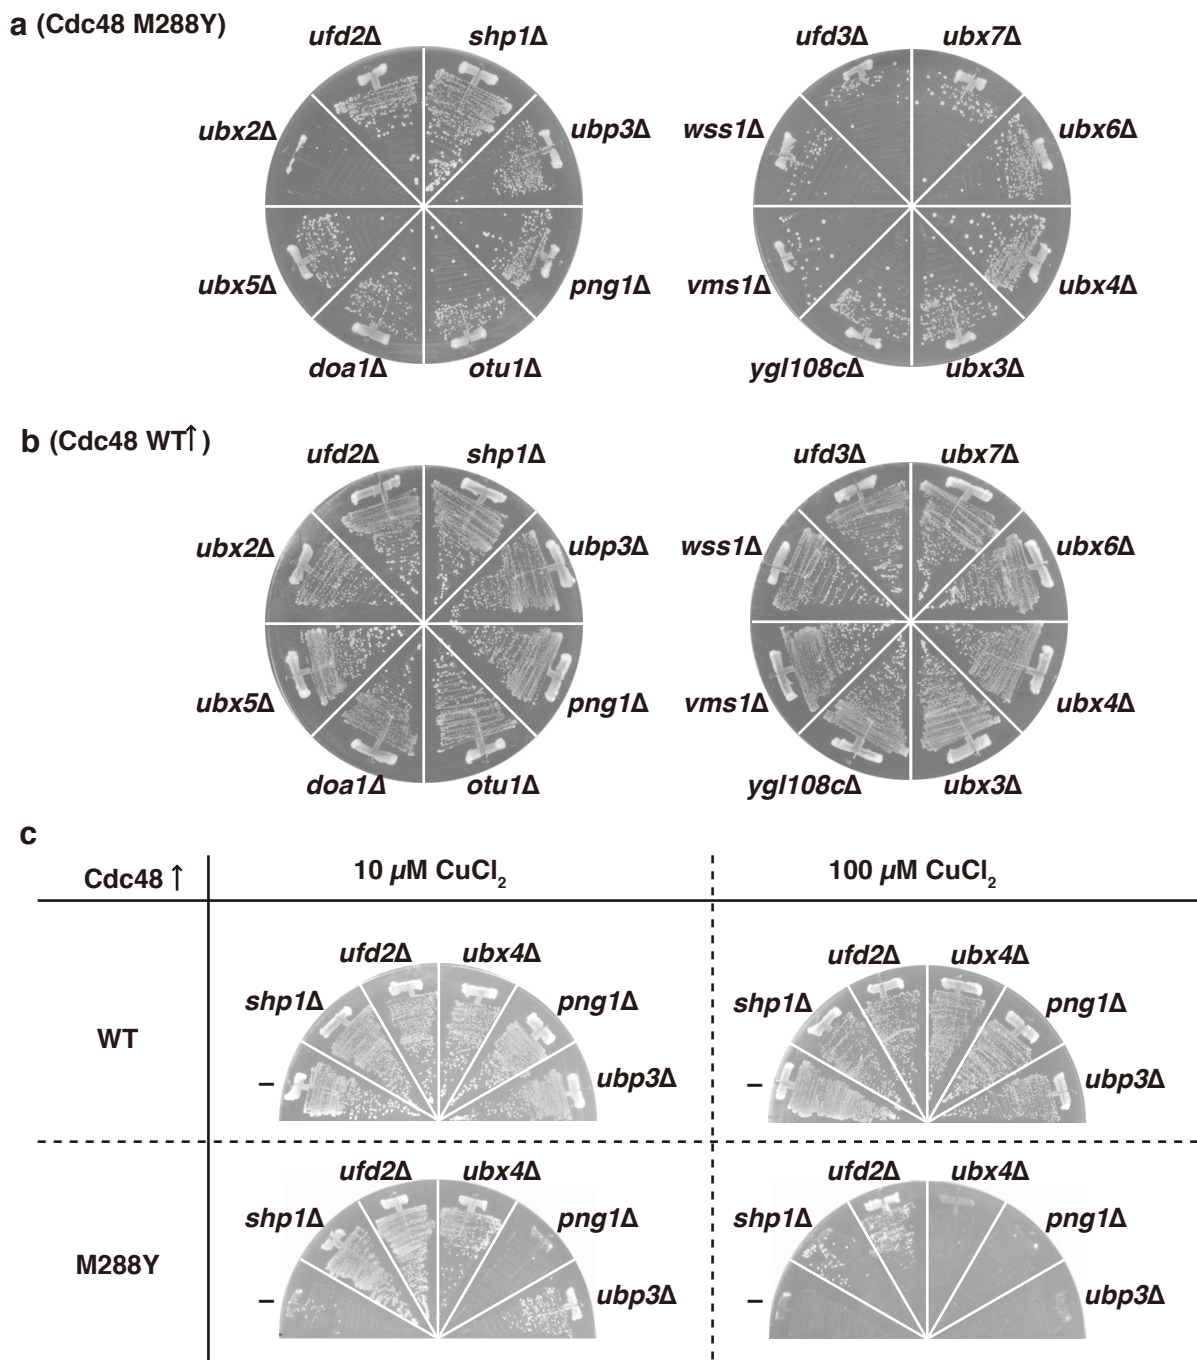

**Supplementary Figure S5.** a, cells lacking the indicated endogenous gene were transformed with a plasmid expressing the Cdc48 M288Y mutant under the control of the *CUP1* promoter. The transformants were grown on media in the absence CuCl<sub>2</sub> at 30°C for 2 days. b, cells lacking the indicated endogenous gene were transformed with a plasmid expressing the wild type Cdc48 under the control of the *CUP1* promoter. The transformants were grown on media supplemented with 10  $\mu$ M CuCl<sub>2</sub> at 30°C for 2 days. c, cells lacking the indicated endogenous gene were transformed with a *CUP1* promoter-regulated plasmid expressing wild type Cdc48 (WT) and mutant Cdc48 with the replacement of M288Y. The transformants were grown on media supplemented with CuCl<sub>2</sub> at 30°C for 2 days.

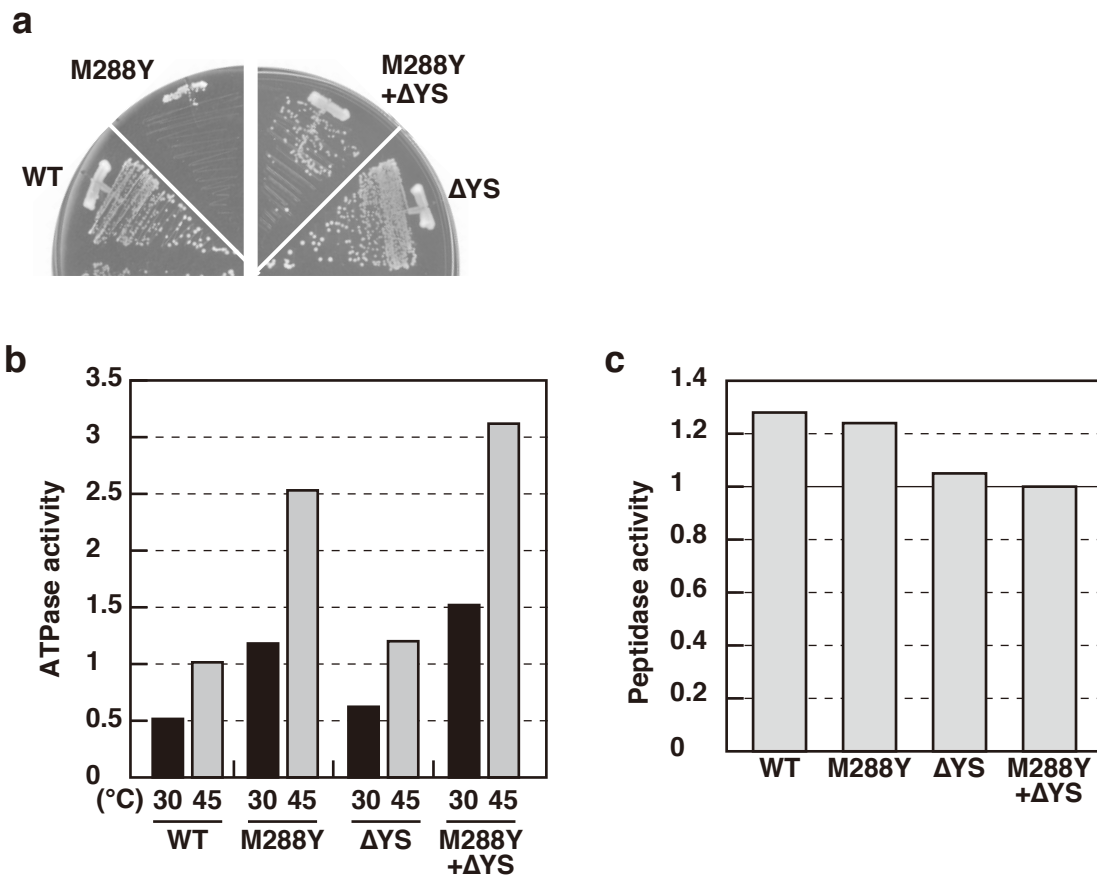

**Supplementary Figure S6.** a, tested were viabilities of cells expressing Cdc48 with the indicated mutations as shown in Fig. 1b.  $\Delta$ YS, deletion of the C-terminal 2 amino acid residues of Cdc48. b, ATPase activity of Cdc48 was increased by the M288Y mutation. Recombinant Cdc48 of wild type (WT) and with the M288Y mutation and deletion of the C-terminal two amino acid residues ( $\Delta$ YS) and both (M288Y+ $\Delta$ YS). The ATPase activity ( $\mu$ mol/min/mg) was measured at 30°C and 45°C by the malachite green assay described previously (Nishikori et al., 2011). c, peptidase activity of the 20S proteasome was enhanced by Cdc48 in a C-terminal two amino acid residues-dependent manner. A synthetic model peptide, Mca-RPPGFSAFK(Dnp)-OH (R&D Systems), was used to measure the peptidase activity of the yeast 20S proteasome in the absence of nucleotides as described previously (Barthelme and Sauer, 2013). Enhancement factors of the peptidase activity by  $\sim$ 20-fold higher concentration of yeast Cdc48 were shown.

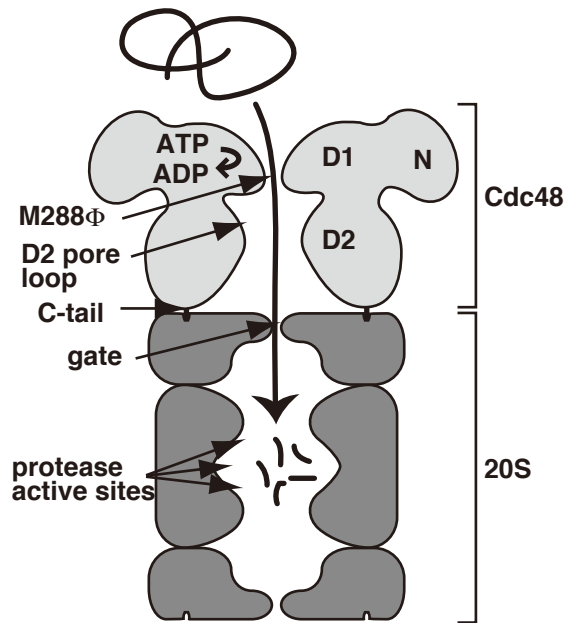

**Supplementary Figure S7.** Proposed model of protein degradation by the Cdc48-20S proteasome complex.



Supplementary Table S1. Yeast strains used in this study

| Strain  | Genotype                                                                                                            | References             |
|---------|---------------------------------------------------------------------------------------------------------------------|------------------------|
| W303    | <i>leu2-3,112/leu2-3,112, trp1-1/trp1-1, can1-100/can1-100, ura3-1/ura3-1, ade2-1/ade2-1, his3-11,15/his3-11,15</i> | Lab stock              |
| W303-1  | <i>leu2-3,112, trp1-1, can1-100, ura3-1, ade2-1, his3-11,15</i>                                                     | Lab stock              |
| YME0115 | W303-1, <i>cdc48Δ::KanMX6</i> , [pME351 ( <i>CDC48, URA3</i> )]                                                     | Esaki and Ogura (2010) |
| YME2063 | W303-1, <i>shp1Δ::CgTRP1</i>                                                                                        | This study             |
| YME2064 | W303-1, <i>ubx2Δ::CgTRP1</i>                                                                                        | This study             |
| YME2065 | W303-1, <i>ubx5Δ::CgTRP1</i>                                                                                        | This study             |
| YME2066 | W303-1, <i>doa1Δ::CgTRP1</i>                                                                                        | This study             |
| YME2067 | W303-1, <i>otu1Δ::CgTRP1</i>                                                                                        | This study             |
| YME2068 | W303-1, <i>png1Δ::CgTRP1</i>                                                                                        | This study             |
| YME2069 | W303-1, <i>ubp3Δ::CgTRP1</i>                                                                                        | This study             |
| YME2070 | W303-1, <i>ufd2Δ::CgTRP1</i>                                                                                        | This study             |
| YME2071 | W303-1, <i>ufd3Δ::CgTRP1</i>                                                                                        | This study             |
| YME2072 | W303-1, <i>wss1Δ::CgTRP1</i>                                                                                        | This study             |
| YME2106 | W303-1, <i>vms1Δ::CgTRP1</i>                                                                                        | This study             |
| YME2108 | W303-1, <i>ygl108Δ::CgTRP1</i>                                                                                      | This study             |
| YME2110 | W303-1, <i>ubx3Δ::CgTRP1</i>                                                                                        | This study             |
| YME2112 | W303-1, <i>ubx4Δ::CgTRP1</i>                                                                                        | This study             |
| YME2114 | W303-1, <i>ubx6Δ::CgTRP1</i>                                                                                        | This study             |
| YME2116 | W303-1, <i>ubx7Δ::CgTRP1</i>                                                                                        | This study             |
| YME2120 | W303-1, <i>ufd1Δ::KanMX6</i> , [pME760 ( <i>UFD1, URA3</i> )]                                                       | This study             |
| YME2126 | W303-1, <i>ufd1Δ::KanMX6</i> , [pME761 ( <i>UFD1, TRP1</i> )]                                                       | This study             |
| YME2127 | W303-1, <i>ufd1Δ::KanMX6</i> , [pME763 ( <i>ufd1-1, TRP1</i> )]                                                     | This study             |
| YME2146 | W303-1, <i>ufd2Δ::CgTRP1</i> , [pME773 ( <i>UFD2-MYC, URA3</i> )]                                                   | This study             |
| YME2147 | W303-1, <i>ufd2Δ::CgTRP1</i> , [pME774 ( <i>ufd2-G274D-myc, URA3</i> )]                                             | This study             |
| YME2148 | W303-1, <i>ufd2Δ::CgTRP1</i> , [pRS316 ( <i>URA3</i> )]                                                             | This study             |
| YME2149 | W303-1, <i>rad23Δ::CgLEU2</i>                                                                                       | This study             |
| YME2151 | W303-1, <i>dsk2Δ::CgTRP1</i>                                                                                        | This study             |
| YME2155 | W303-1, <i>rad23Δ::CgLEU2, dsk2Δ::CgTRP1</i>                                                                        | This study             |
| YME2192 | W303-1, <i>PRE4::CgLEU2</i>                                                                                         | This study             |
| YME2193 | W303-1, <i>pre4-1::CgLEU2</i>                                                                                       | This study             |
| YME2240 | W303-1, <i>HIS3::LexA-ER-VP60, URA3::P<sub>LEXA8</sub>-CDC48 WT</i>                                                 | This study             |
| YME2241 | W303-1, <i>HIS3::LexA-ER-VP60, URA3::P<sub>LEXA8</sub>-CDC48 M288Y</i>                                              | This study             |
